# Supplementary material for: The nano-bio interactions of rare-earth doped BaF2 nanophosphors shape the developmental processes of zebrafish
Source: Royal Society of Chemistry journal article supplement (doi:10.1039/d0bm01282c), 2020-01-01
Supplement: d0bm01282c1.pdf [file d0bm01282c1.pdf]

# The Nano-Bio Interactions of Rare-Earth Doped BaF<sub>2</sub> Nanophosphors Shape the Developmental Processes of Zebrafish

Yogendra Nath Chouryal<sup>a</sup>, Shubham Nema<sup>b‡</sup>, Rahul Kumar Sharma<sup>a,c‡</sup>, Heera Lal Kewat<sup>a</sup>,  
Archana Pandey<sup>a</sup>, Pushpal Ghosh<sup>\*a</sup>, Yogesh Bhargava<sup>\*b</sup>

<sup>a</sup>School of Chemical Science and Technology, Department of Chemistry,

Dr. Harisingh Gour University (A Central University), Sagar-470003, M.P. India

<sup>b</sup>Molecular Engineering and Imaging Lab, Department of Microbiology, Dr. Harisingh Gour  
University (A Central University), Sagar-470003, M.P. India

<sup>c</sup>Department of Chemistry, Government Shyam Sundar Agrawal PG College, Sihora-483225,  
M.P. India

## MATERIALS AND METHOD

**Chemicals:** Barium acetate (Himedia, 99%), Ammonium fluoride (Himedia, 97%) Europium nitrate hexahydrate (Alfa Aesar 99.9%), Cerium nitrate (Alfa Aesar 99.99%), Terbium nitrate (Alfa Aesar 99.90%), 1-methylimidazolium (Alfa Aesar, 99%), acetone (Loba chemie, 99%), Acetylacetate (Loba chemie, 99.5%), Ethanol (Merck, ACS grade), Deionised water (CDH), Methanol (Loba chemie, 99%).

**Synthesis of [C<sub>2</sub>mim][Br] IL:** This IL is synthesized by modifying a previously reported procedure, under an inert environment (Ar gas).<sup>1</sup> In a typical synthesis, 10 ml of 0.126 mole of 1-methyl imidazole was taken into a three-necked round bottom (RB) flask on a cold water bath. Thereafter, 12.40 ml of 0.166 mole C<sub>2</sub>H<sub>5</sub>Br was drop-wise added to the RB flask and then the reaction mixture was allowed to reflux for 3-4 hours and obtained white solid crystal was crushed and washed for 2-3 times with ethyl acetate. The obtained product was dried under

vacuum for 24 hours.

**Characterization Techniques of materials:** PXRD was carried out on a D8 Advance BRUKER, equipped with Cu K $\alpha$  (1.54060 Å) as the incident radiation. The crystallite size was calculated using Scherer equation  $D = K\lambda/\beta\cos\theta$ , where  $K = 0.9$ ,  $D$  represents crystallite size (Å),  $\lambda$  is the wavelength of Cu K $\alpha$  radiation and  $\beta$  is the corrected half-width of the diffraction peak. Atomistic level growth of nanoparticle was confirmed using FEI TALOS 200S instrument at a working voltage of 200 kV. The high-resolution TEM/HRTEM is used to map the shape, size, and lattice structure of the nanocrystals dispersed on a carbon-coated copper grid from acetone solution. Morphological characterization was also carried out by SEM using a NOVA NANO SEM-450, FEI. Photoluminescence emission and excitation spectra were measured using a HORIBA JOBIN YVON made Fluoromax-4 spectrofluorometer. Hydrodynamic diameter, size distribution (polydispersity index or PI) and Zeta Potential of pure BaF<sub>2</sub> and BaF<sub>2</sub>:Ce<sup>3+</sup>/Tb<sup>3+</sup> nanoparticles were determined using NanoPlus-3 (Version 5.01, Micromeritics Instrument Corporation, Particulate Systems, Norcross, GA, USA). Nanoparticles at suitable concentrations (range 10 – 100 mg/L) were dispersed in 10 mM NaCl solution by sonication in a water bath for 20 minutes. All the measurements were carried out at an equilibrium temperature of 25 °C. Smoluchowski formula for the approximation of zeta potentials from electrophoretic mobility is selected in the present case.

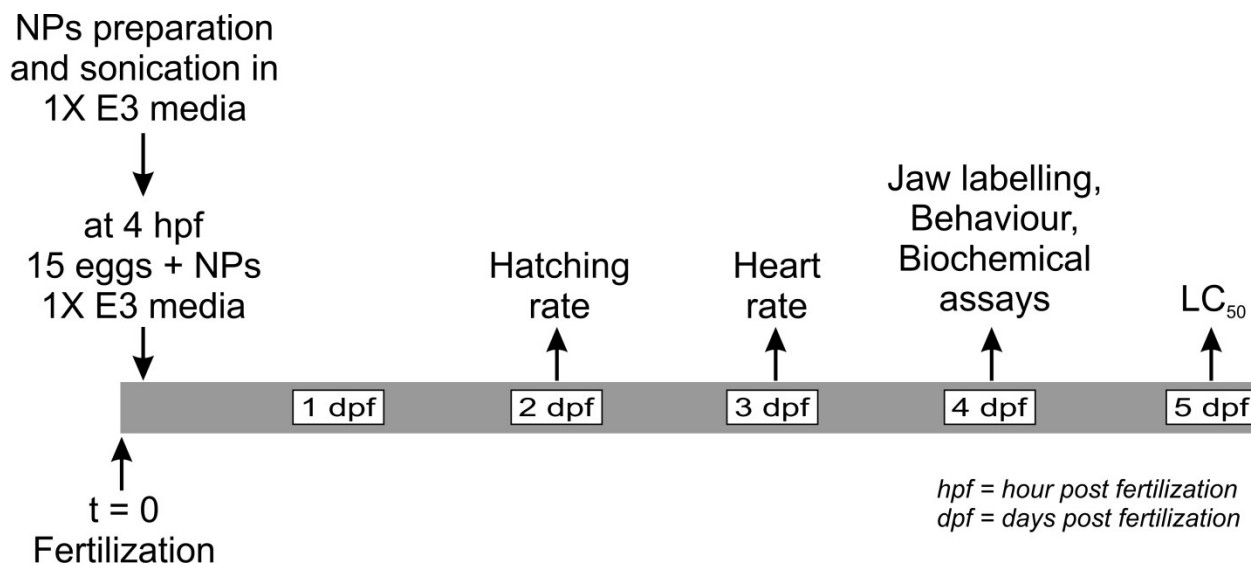

Figure SI 1. The layout of the experimental design used in the present study. All nanoparticles (NPs) were prepared in the 1X E3 aqueous media by sonication. All treatment (control and NPs) were started on zebrafish embryo of 4 hpf stage until the indicated time. We have used 15 eggs per treatment at the start of every experiment per treatment group. At the indicated time eight larvae (except for hatching rate and LC<sub>50</sub>) were randomly selected and different endpoints were measured e.g. at 2 dpf (hatching rate), at 3 dpf (heart rate), at 4 dpf (jaw labeling, behavior and other biochemical assays) and at 5 dpf stage LC<sub>50</sub> was determined.

### Lattice strain

**Williamson and Hall Equation:** Williamson and Hall method is used for determining the lattice strain of the as-prepared nanoparticles:<sup>2</sup>

$$\frac{\beta \cos \theta}{\lambda} = \frac{1}{D} + \eta \frac{\sin \theta}{\lambda} \quad (1)$$

Where, the graph is plotted between  $\beta \cos \theta / \lambda$  vs  $\sin \theta / \lambda$ . From the slope of the graph and intercept, lattice strain ( $\eta$ ) crystallite size ( $D$ ) can be quantitatively determined respectively. The negative and positive magnitudes of the slope of the graph indicate the compressive and tensile strains respectively.

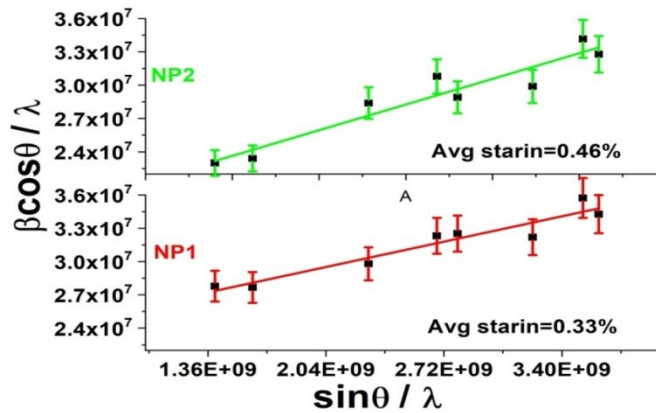

**Figure SI 2:** Lattice strain graph of as-prepared NP1 (un-doped BaF<sub>2</sub>) and NP2 (1 % Ce<sup>3+</sup>/Tb<sup>3+</sup> doped BaF<sub>2</sub>) nanoparticles.

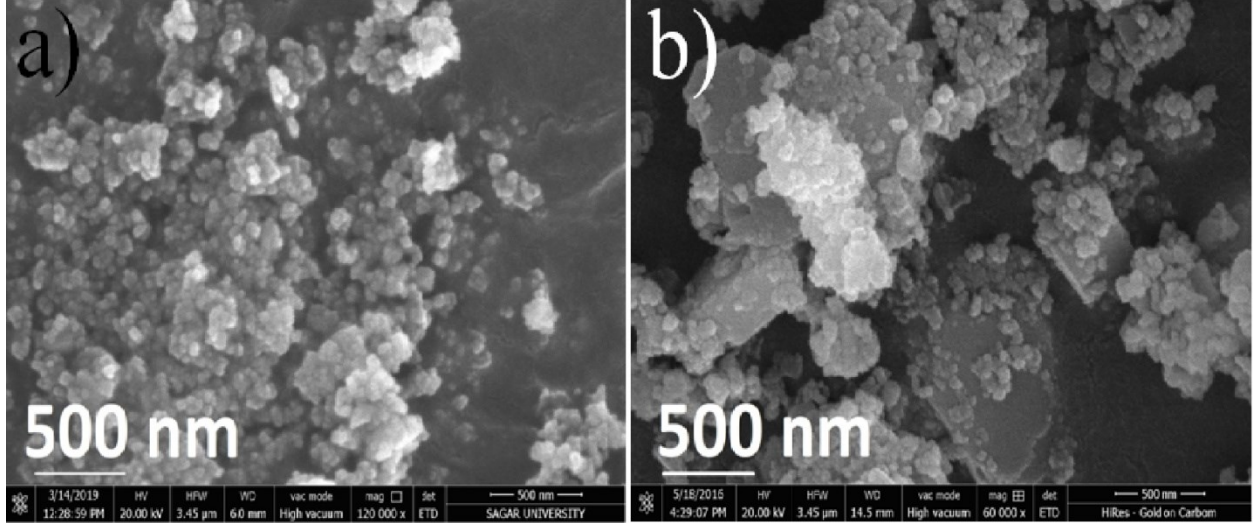

**Figure SI 3.** High magnification FESEM images of as-prepared nanoparticles: a) NP1 (un-doped BaF<sub>2</sub>) and b) NP2 (1 % Ce<sup>3+</sup>/ 1% Tb<sup>3+</sup> doped BaF<sub>2</sub>).

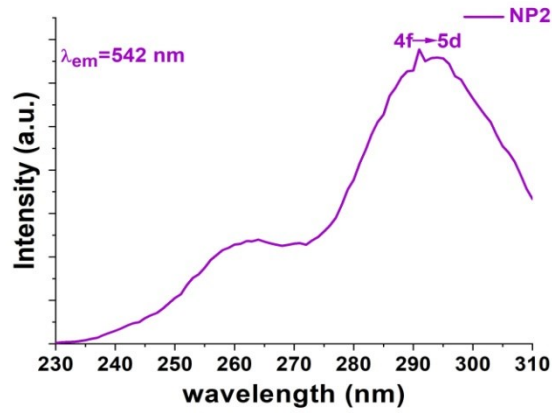

**Figure SI 4.** The excitation spectrum of as-prepared NP2 (1 % Ce<sup>3+</sup>/ 1% Tb<sup>3+</sup> doped BaF<sub>2</sub>) nanoparticles measured using  $\lambda_{em} = 542$  nm.

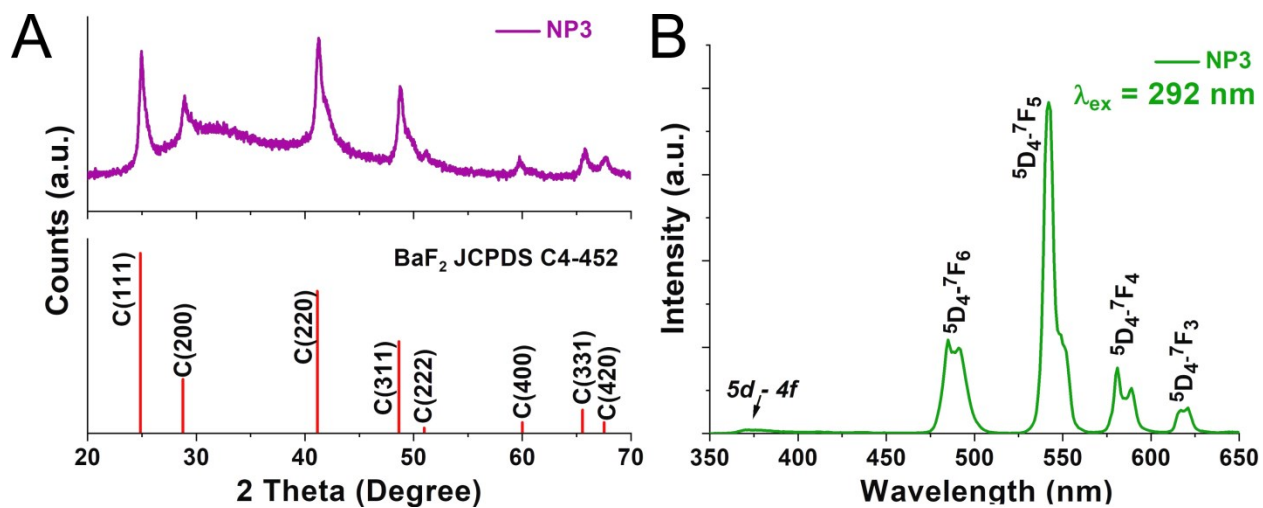

**Figure SI 5.** A) PXRD patterns of NP3 (5 % Ce<sup>3+</sup>/Tb<sup>3+</sup> doped BaF<sub>2</sub> nanoparticles) synthesized via ionic liquid. B) Emission spectra of NP3 (λ<sub>ex</sub> = 292 nm).

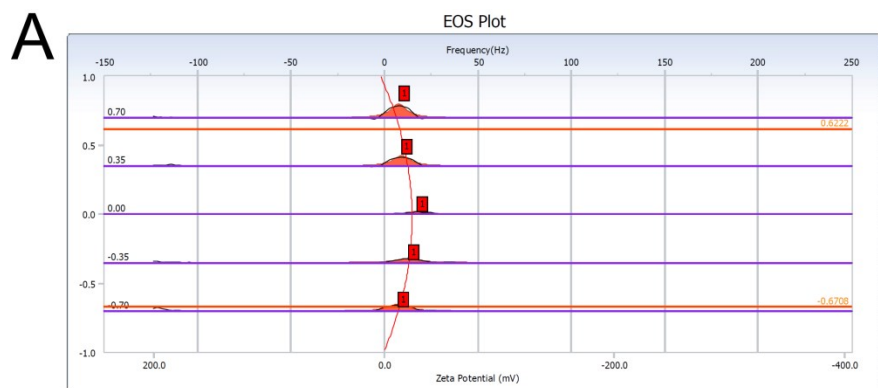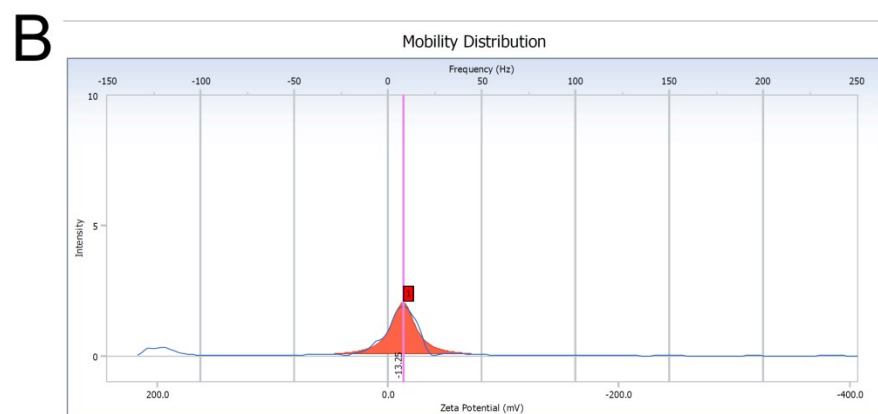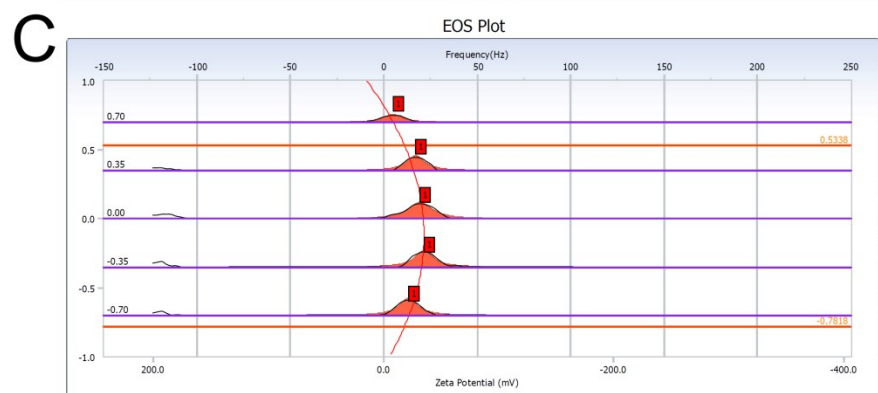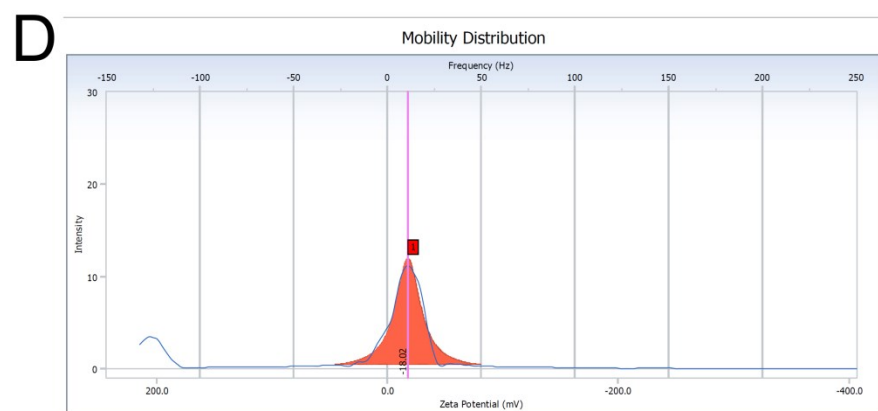

**Figure SI 6.** EOS flow plot and mobility distribution of A, B) NP1 (BaF<sub>2</sub>) and C, D) NP2 (1 % Ce<sup>3+</sup>/Tb<sup>3+</sup> doped BaF<sub>2</sub>) nanoparticles. Using flow cell type the zeta potential and other parameters of NP1 and NP2 was found to be under following conditions. For NP1: -13.25 mV (zeta potential), -1.035e-004 cm<sup>2</sup>/V s (mobility), 0.9092 mS/cm (conductivity), -16.43 V/cm (avg electric field) and -0.75 mA (avg current). For NP2: -18.02 mV (zeta potential), -1.411e-004 cm<sup>2</sup>/V s (mobility), 1.1781 mS/cm (conductivity), -16.40 V/cm (avg electric field) and -0.97 mA (avg current).

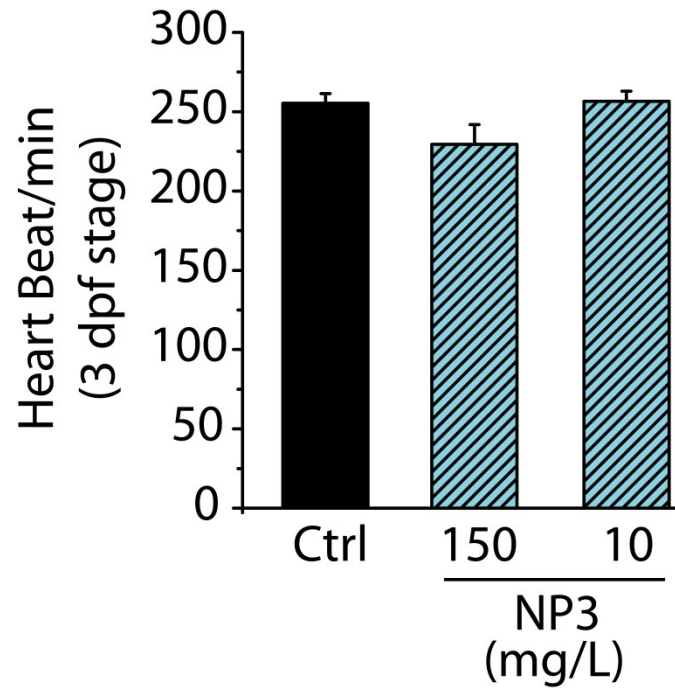

**Figure SI 7.** Impact of NP3 (5 %  $\text{Ce}^{3+}$ / 5%  $\text{Tb}^{3+}$  doped  $\text{BaF}_2$ ) on the heart rate. The data represents mean  $\pm$  SEM of 8 – 16 zebrafish larvae of 3 dpf stage. We have seen no significant difference in heart rate between control and NP3 treated (at both concentrations) groups.



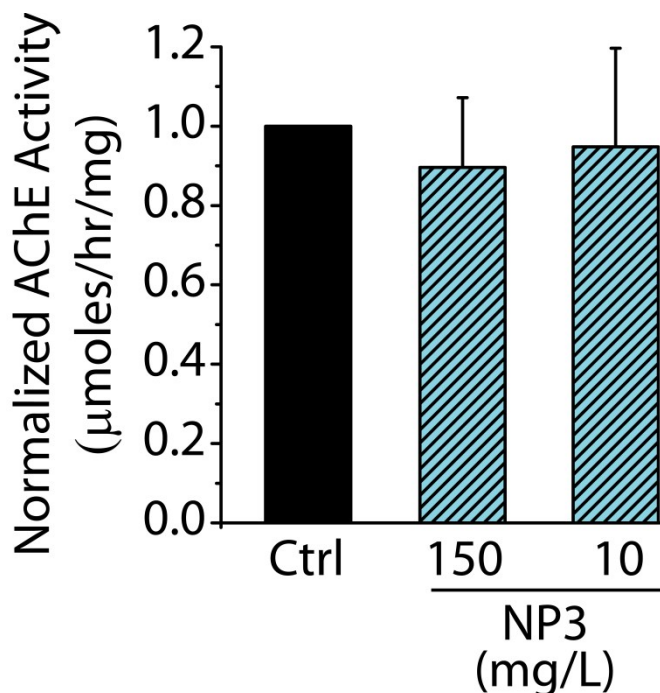

**Figure SI 8.** Impact of NP3 (5 %  $\text{Ce}^{3+}/\text{Tb}^{3+}$  doped  $\text{BaF}_2$ ) on the acetylcholinesterase (AChE) enzyme activity. The data represents mean  $\pm$  SEM of two experiments in which a pool of 8 larvae per experiment per treatment group. Like NP1 and NP2 effect on AChE enzyme activity, we have also seen no significant difference in the AChE enzyme activity between control and NP3 treated (at both concentrations) groups.

**Table SI 1.** Phase, lattice strain and crystallite size of the as-prepared 1% RE doped  $\text{BaF}_2$  nanoparticles under similar reaction conditions (IL=  $[\text{C}_2\text{mim}]\text{Br}$ ), (Y=Yes and N=No).

| Sample code | Sample name                                  | IL (Y/N) | As-prepared /calcined | Cell parameter           |            | Phase | Crystallite size(nm) ( $\pm 2$ ) | Average lattice strain(%) | Lattice strain |
|-------------|----------------------------------------------|----------|-----------------------|--------------------------|------------|-------|----------------------------------|---------------------------|----------------|
|             |                                              |          |                       | A ( $\text{\AA}^\circ$ ) | Volume     |       |                                  |                           |                |
| NP1         | $\text{BaF}_2$                               | Yes      | As-prepared           | 6.201(19)                | 238.55(14) | Cubic | 16.00                            | 0.336                     | Tensile        |
| NP2         | $\text{BaF}_2:\text{Ce}^{3+}/\text{Tb}^{3+}$ | Yes      | As-prepared           | 6.2039(17)               | 238.78(11) | Cubic | 17.60                            | 0.462                     | Tensile        |

Table SI 2: Electrochemical and physical characterization of as-prepared nanoparticles.

| Nanoparticles                                                        | Structural dimensions (Average) (a x b) (nm) * | Zeta potential (mV) | Polydispersity Index (PDI) | Hydrodynamic diameter (D) (nm)              |
|----------------------------------------------------------------------|------------------------------------------------|---------------------|----------------------------|---------------------------------------------|
| NP1 (un doped BaF <sub>2</sub> )                                     | 20 nm & 19 nm                                  | -13.25              | 0.487                      | D (10%) = 154.30 nm.<br>D (50%) = 367.00 nm |
| NP2 (1 % Ce <sup>3+</sup> /Tb <sup>3+</sup> doped BaF <sub>2</sub> ) | 22 nm & 17 nm                                  | -18.02              | 0.652                      | D (10%) = 202.10 nm.<br>D (50%) = 458.40 nm |

\* Our nanoparticles are cuboidal shaped which is evident from TEM images. Thereby we have measured the edge length of the nanoparticle which is evident from TEM images.

Supplementary table SI 3: Percent morphological abnormalities in the developing zebrafish larvae.

| Morphological endpoint | Treatment      | % Mean $\pm$ SEM  | N (out of number of larvae)# |
|------------------------|----------------|-------------------|------------------------------|
| Tail bend              | Control        | 3.12 $\pm$ 3.12   | 32                           |
|                        | NP1 (150 mg/L) | 62.5 $\pm$ 12.5   | 32                           |
|                        | NP1 (10 mg/L)  | 12.5 $\pm$ 8.84   | 32                           |
|                        | NP2 (150 mg/L) | 56.25 $\pm$ 10.83 | 32                           |
|                        | NP2 (10 mg/L)  | 9.38 $\pm$ 5.98   | 32                           |

#This data is from 4 dpf larvae.

| Morphological endpoint | Treatment      | % Mean $\pm$ SEM  | N (number of larvae) <sup>†</sup> |
|------------------------|----------------|-------------------|-----------------------------------|
| Pericardial edema      | Control        | 10.42 $\pm$ 3.84  | 48                                |
|                        | NP1 (150 mg/L) | 23.21 $\pm$ 7.43  | 46                                |
|                        | NP1 (10 mg/L)  | 5.79 $\pm$ 3.87   | 49                                |
|                        | NP2 (150 mg/L) | 18.15 $\pm$ 11.41 | 43                                |
|                        | NP2 (10 mg/L)  | 8.33 $\pm$ 4.17   | 48                                |

<sup>†</sup>This data is from 3 dpf larvae.

| Morphological endpoint | Treatment      | % Mean $\pm$ SEM  | N (number of larvae) <sup>†</sup> |
|------------------------|----------------|-------------------|-----------------------------------|
| Yolksac/tube edema     | Control        | 12.5 $\pm$ 6.45   | 48                                |
|                        | NP1 (150 mg/L) | 68.85 $\pm$ 10.48 | 45                                |
|                        | NP1 (10 mg/L)  | 3.94 $\pm$ 2.5    | 49                                |
|                        | NP2 (150 mg/L) | 60.81 $\pm$ 14.15 | 43                                |
|                        | NP2 (10 mg/L)  | 20.83 $\pm$ 10.54 | 48                                |

<sup>†</sup>This data is from 3 dpf larvae.

Supplementary table SI 4: Percent frequency distribution of zebrafish larvae in different concentric zones during open-field behaviour for different treatment groups.

| Treatment group | Zones  | % Mean $\pm$ SEM | N (out of number of larvae) |
|-----------------|--------|------------------|-----------------------------|
| Control         | Zone-1 | 0                | 32                          |
|                 | Zone-2 | 21.88 $\pm$ 5.98 |                             |
|                 | Zone-3 | 78.13 $\pm$ 5.98 |                             |
| NP1 (150 mg/L)  | Zone-1 | 21.88 $\pm$ 7.86 | 32                          |

|                |        |                   |    |
|----------------|--------|-------------------|----|
|                | Zone-2 | $43.75 \pm 6.25$  |    |
|                | Zone-3 | $34.38 \pm 13.86$ |    |
| NP1 (10 mg/L)  | Zone-1 | $12.5 \pm 5.1$    | 32 |
|                | Zone-2 | $31.25 \pm 8.07$  |    |
|                | Zone-3 | $56.25 \pm 6.25$  |    |
| NP2 (150 mg/L) | Zone-1 | $25 \pm 11.41$    | 32 |
|                | Zone-2 | $46.88 \pm 7.86$  |    |
|                | Zone-3 | $28.13 \pm 7.86$  |    |
| NP2 (10 mg/L)  | Zone-1 | $9.38 \pm 5.98$   | 32 |
|                | Zone-2 | $21.88 \pm 5.98$  |    |
|                | Zone-3 | $68.75 \pm 8.07$  |    |

## REFERENCES

1. E. R. Parnham, A. M. Z. Slawin, and R. E. Morris, *J. Solid State Chem.* 2007, **180** (1), 49–53.
2. R. K. Sharma, A. V. Mudring and P. Ghosh, *J. Lumin.*, 2017, **189**, 44–63.
